# Supplementary material
Source: PubMed Central journal article supplement (PMC7460899)
Supplement: ASN.2020040534SupplementaryData.pdf [file ASN.2020040534SupplementaryData.pdf]

# **Epidemiology of Covid-19 in an urban dialysis centre**

## **Supplementary Appendix**

### **Table of Contents**

|                                               |          |
|-----------------------------------------------|----------|
| <i>List of Collaborating Clinicians</i> ..... | <b>2</b> |
|-----------------------------------------------|----------|

## List of Collaborating Clinicians

A list of senior clinicians at West London Renal and Transplant Centre caring for these patients and collaborating with this investigation is provided below:

Maura Appelbe  
Edwina Brown  
Tom Cairns  
Rawya Charif  
Marie Condon  
Claire Edwards  
Andrew Frankel  
Megan Griffith  
Julie Harris  
Sharon Harris  
Peter Hill  
Chris Jones  
Andreas Kousios  
Jeremy Levy  
Liz Lightstone  
Lian Liu  
Gaetano Lucisano  
Kathleen Lynch  
Stephen McAdoo  
Nicholas Medjeral-Thomas  
Dihlabelo Moabi  
Anand Muthusamy  
Margaret Nevin  
Andrew Palmer  
Darren Parsons  
Virginia Prout  
Sally Punzalan  
Emma Salisbury  
Eleanor Sandhu  
Colin Smith  
Anisha Tanna  
David Thomas  
James Tomlinson  
Philip Webster  
Michelle Willicombe
